# Supplementary material for: Association between the rs3812316 Single Nucleotide Variant of the MLXIPL Gene and Alpha-Linolenic Acid Intake with Triglycerides in Mexican Mestizo Women
Source: MDPI journal article supplement (doi:10.3390/nu14224726), 2022-11-09
Supplement: s1 [file s1]

Supplemental material

**Table S1.** Fatty acids intake in women and men

| Variable      | Total<br>N = 587 | Women<br>N = 415 | Men<br>N = 172 | <i>p</i> -value |
|---------------|------------------|------------------|----------------|-----------------|
| SFA 4:0 (g)   | 0.35 ± 0.38      | 0.33 ± 0.35      | 0.40 ± 0.44    | 0.075           |
| SFA 12:0 (g)  | 0.44 ± 0.63      | 0.43 ± 0.69      | 0.48 ± 0.45    | 0.396           |
| SFA 17:0 (g)  | 0.06 ± 0.45      | 0.06 ± 0.54      | 0.04 ± 0.06    | 0.530           |
| SFA 20:0 (g)  | 0.05 ± 0.19      | 0.05 ± 0.22      | 0.05 ± 0.09    | 0.852           |
| SFA 22:0 (g)  | 0.02 ± 0.06      | 0.03 ± 0.07      | 0.02 ± 0.06    | 0.476           |
| MUFA 20:1 (g) | 0.17 ± 0.82      | 0.18 ± 0.98      | 0.16 ± 0.15    | 0.882           |
| MUFA 22:1 (g) | 0.01 ± 0.04      | 0.01 ± 0.04      | 0.01 ± 0.04    | 0.724           |
| PUFA 18:4 (g) | 0.00 ± 0.08      | 0.01 ± 0.09      | 0.00 ± 0.02    | 0.714           |
| PUFA 20:5 (g) | 0.01 ± 0.04      | 0.01 ± 0.04      | 0.01 ± 0.03    | 0.762           |
| PUFA 22:5 (g) | 0.02 ± 0.04      | 0.02 ± 0.04      | 0.02 ± 0.04    | 0.872           |
| PUFA 22:6 (g) | 0.05 ± 0.13      | 0.05 ± 0.13      | 0.06 ± 0.13    | 0.565           |

**Table S2.** Baseline characteristics in the subgroup of subjects under cholecystectomy

| Variable                  | Total<br>N = 24 | Women<br>N = 18 | Men<br>N = 6 | <i>p</i> -value |
|---------------------------|-----------------|-----------------|--------------|-----------------|
| Age (y)                   | 35.1±10.6       | 35.2±7.9        | 35.0±17.0    | 0.975           |
| BMI (kg/m <sup>2</sup> )  | 27.1±4.2        | 27.2±4.3        | 26.7±4.4     | 0.802           |
| Waist circumference (cm)  | 86.0±11.2       | 83.1±10.1       | 93.3±11.4    | 0.774           |
| Body fat percentage (%)   | 30.7±10.5       | 33.6±8.8        | 24.5±11.7    | 0.075           |
| Glucose (mg/dL)           | 87.7±9.8        | 86.9±9.3        | 90.0±11.6    | 0.521           |
| Insulin (μU/mL)           | 5.0±2.8         | 5.1±2.3         | 4.6±4.1      | 0.688           |
| HOMA-IR                   | 1.2±0.5         | 1.2±0.5         | 1.7±0.4      | 0.788           |
| Triglycerides (mg/dL)     | 146.6±60.6      | 145.3±63.8      | 150.3±56.6   | 0.868           |
| Total cholesterol (mg/dL) | 159.6±52.7      | 169.2±47.9      | 132.5±60.7   | 0.147           |

|                          |           |            |           |       |
|--------------------------|-----------|------------|-----------|-------|
| HDL-cholesterol (mg/dL)  | 40.0±14.0 | 42.1±15.2  | 34.1±8.2  | 0.241 |
| LDL-cholesterol (mg/dL)  | 93.4±47.2 | 102.3±43.9 | 68.1±51.0 | 0.131 |
| VLDL-cholesterol (mg/dL) | 29.2±12.2 | 28.8±12.8  | 30.1±11.6 | 0.831 |

**Table S3:** Anthropometric, biochemical, and nutritional variables according to the rs17145750 SNV's of *MLXIPL* gene

| Variable                 | Women            |                  |                 | Men                  |                  |                 |
|--------------------------|------------------|------------------|-----------------|----------------------|------------------|-----------------|
|                          | CC<br>N = 342    | CT+TT<br>N = 73  | <i>p</i> -value | CC<br>N = 148        | CT+TT<br>N = 24  | <i>p</i> -value |
| Age (y)                  | 42.06 ± 11.85    | 39.97 ± 11.17    | 0.170           | 39.30 ± 12.11        | 38.95 ± 12.4     | 0.898           |
| BMI (kg/m <sup>2</sup> ) | 31.13 ± 7.06     | 31.88 ± 6.07     | 0.405           | 29.17 ± 6.18         | 30.15 ± 5.27     | 0.467           |
| Waist circumference (cm) | 94.52 ± 16.22    | 96.71 ± 15.05    | 0.298           | 97.70 ± 16.48        | 100.42 ± 16.33   | 0.454           |
| Hip circumference (cm)   | 110.78 ± 14.64   | 111.89 ± 11.98   | 0.550           | 104.66 ± 11.12       | 108.15 ± 11.16   | 0.157           |
| WHR                      | 0.84 ± 0.08      | 0.85 ± 0.08      | 0.527           | 0.91 ± 0.08          | 0.90 ± 0.07      | 0.445           |
| Fat mass (g)             | 33.04 ± 14.23    | 34.42 ± 12.71    | 0.455           | 25.19 ± 14.27        | 27.22 ± 13.17    | 0.513           |
| Body fat percentage (%)  | 40.04 ± 9.02     | 40.98 ± 7.48     | 0.414           | 27.73 ± 9.59         | 27.84 ± 9.52     | 0.957           |
| Glucose (mg/dl)          | 94.00 ± 17.38    | 91.01 ± 14.82    | 0.176           | 96.06 ± 22.42        | 93.08 ± 10.91    | 0.524           |
| Insulin                  | 13.41 ± 12.47    | 14.98 ± 15.07    | 0.360           | 10.92 ± 13.25        | 8.48 ± 5.23      | 0.406           |
| HOMA-IR                  | 3.14 ± 3.11      | 3.56 ± 4.45      | 0.347           | 2.55 ± 3.10          | 1.97 ± 1.35      | 0.399           |
| Triglycerides (mg/dl)    | 140.87 ± 76.01   | 129.28 ± 63.18   | 0.305           | 148.11 ± 69.23       | 156.85 ± 80.30   | 0.678           |
| CT (mg/dl)               | 187.74 ± 40.99   | 186.99 ± 48.07   | 0.891           | 186.92 ± 40.89       | 190.93 ± 33.08   | 0.649           |
| VLDL-c (mg/dl)           | 28.17 ± 15.20    | 25.85 ± 12.63    | 0.228           | 29.62 ± 13.84        | 31.37 ± 16.05    | 0.575           |
| LDL-c (mg/dl)            | 114.77 ± 38.18   | 118.35 ± 40.47   | 0.476           | 116.57 ± 36.85       | 115.76 ± 26.47   | 0.918           |
| HDL-c (mg/dl)            | 44.79 ± 14.38    | 42.78 ± 12.47    | 0.271           | 40.72 ± 12.34        | 43.80 ± 13.02    | 0.263           |
| Non-HDL-c (mg/dl)        | 142.94 ± 41.65   | 144.20 ± 45.36   | 0.819           | 146.19 ± 42.32       | 147.13 ± 32.60   | 0.918           |
| Energy (kcal)            | 1855.65 ± 711.48 | 1866.65 ± 737.54 | 0.909           | 2397.57 ±<br>1004.74 | 2263.07 ± 926.64 | 0.540           |
| Carbohydrates (kcal)     | 917.39 ± 372.59  | 933.96 ± 411.22  | 0.745           | 1172.74 ±<br>512.33  | 1156.36 ± 480.77 | 0.884           |
| Proteins (kcal)          | 323.72 ± 126.59  | 310.45 ± 115.99  | 0.429           | 419.44 ± 173.16      | 384.99 ± 173.78  | 0.368           |

|                                |                 |                 |              |                 |                 |       |
|--------------------------------|-----------------|-----------------|--------------|-----------------|-----------------|-------|
| <b>Fat (kcal)</b>              | 613.22 ± 322.04 | 622.23 ± 291.14 | 0.833        | 805.38 ± 433.10 | 721.72 ± 381.58 | 0.375 |
| <b>Carbohydrates (%)</b>       | 49.79 ± 9.63    | 49.98 ± 8.05    | 0.881        | 49.07 ± 9.42    | 51.66 ± 9.63    | 0.214 |
| <b>Proteins (%)</b>            | 17.91 ± 4.87    | 17.13 ± 4.21    | 0.228        | 18.11 ± 4.24    | 17.23 ± 3.80    | 0.341 |
| <b>Fat (%)</b>                 | 32.19 ± 9.04    | 32.87 ± 7.67    | 0.564        | 32.81 ± 8.70    | 31.10 ± 8.05    | 0.370 |
| <b>Saturated fat (g)</b>       | 22.93 ± 13.25   | 22.36 ± 11.27   | 0.743        | 30.22 ± 17.83   | 26.54 ± 15.75   | 0.342 |
| <b>Monounsaturated fat (g)</b> | 20.58 ± 11.46   | 22.22 ± 10.45   | 0.280        | 27.46 ± 16.49   | 24.85 ± 12.99   | 0.462 |
| <b>Polyunsaturated fat (g)</b> | 11.01 ± 7.77    | 12.24 ± 8.20    | 0.243        | 13.01 ± 10.26   | 12.78 ± 7.84    | 0.917 |
| <b>SFA 4:0 (g)</b>             | 0.34 ± 0.36     | 0.31 ± 0.32     | 0.614        | 0.41 ± 0.46     | 0.34 ± 0.29     | 0.522 |
| <b>SFA 6:0 (g)</b>             | 0.25 ± 0.26     | 0.24 ± 0.24     | 0.843        | 0.31 ± 0.35     | 0.27 ± 0.20     | 0.611 |
| <b>SFA 8:0 (g)</b>             | 0.20 ± 0.20     | 0.22 ± 0.27     | 0.482        | 0.26 ± 0.28     | 0.22 ± 0.16     | 0.370 |
| <b>SFA 10:0 (g)</b>            | 0.35 ± 0.34     | 0.35 ± 0.32     | 0.962        | 0.44 ± 0.42     | 0.41 ± 0.31     | 0.736 |
| <b>SFA 12:0 (g)</b>            | 0.41 ± 0.48     | 0.53 ± 1.33     | 0.201        | 0.48 ± 0.47     | 0.46 ± 0.34     | 0.888 |
| <b>SFA 14:0 (g)</b>            | 1.74 ± 1.42     | 1.64 ± 1.17     | 0.594        | 2.20 ± 1.77     | 2.08 ± 1.47     | 0.759 |
| <b>SFA 16:0 (g)</b>            | 10.77 ± 6.24    | 11.06 ± 5.37    | 0.724        | 14.29 ± 8.94    | 13.36 ± 7.54    | 0.628 |
| <b>SFA 17:0 (g)</b>            | 0.07 ± 0.60     | 0.03 ± 0.05     | 0.636        | 0.04 ± 0.06     | 0.03 ± 0.04     | 0.443 |
| <b>SFA 18:0 (g)</b>            | 4.68 ± 30       | 4.88 ± 2.60     | 0.618        | 6.25 ± 4.23     | 5.85 ± 3.07     | 0.663 |
| <b>SFA 20:0 (g)</b>            | 0.06 ± 0.24     | 0.04 ± 0.05     | 0.664        | 0.05 ± 0.10     | 0.03 ± 0.04     | 0.320 |
| <b>SFA 22:0 (g)</b>            | 0.03 ± 0.07     | 0.02 ± 0.04     | 0.505        | 0.02 ± 0.06     | 0.01 ± 0.01     | 0.207 |
| <b>MUFA 14:1 (g)</b>           | 0.06 ± 0.08     | 0.05 ± 0.05     | 0.341        | 0.08 ± 0.09     | 0.07 ± 0.08     | 0.629 |
| <b>MUFA 16:1 (g)</b>           | 1.04 ± 0.73     | 1.01 ± 0.56     | 0.699        | 1.39 ± 1.17     | 1.33 ± 0.86     | 0.788 |
| <b>MUFA 18:1 (g)</b>           | 17.96 ± 10.33   | 19.29 ± 9.05    | 0.329        | 24.04 ± 15.22   | 22.47 ± 11.88   | 0.630 |
| <b>MUFA 20:1 (g)</b>           | 0.19 ± 1.09     | 0.13 ± 0.09     | 0.655        | 0.17 ± 0.16     | 0.16 ± 0.10     | 0.886 |
| <b>MUFA 22:1 (g)</b>           | 0.01 ± 0.04     | 0.00 ± 0.01     | <b>0.003</b> | 0.01 ± 0.04     | 0.02 ± 0.06     | 0.293 |
| <b>PUFA 18:2 (g)</b>           | 9.13 ± 6.83     | 10.43 ± 7.52    | 0.167        | 10.85 ± 9.54    | 10.83 ± 7.44    | 0.992 |
| <b>PUFA 18:3 (g)</b>           | 0.89 ± 0.99     | 0.91 ± 0.58     | 0.858        | 1.05 ± 0.76     | 0.95 ± 0.42     | 0.524 |
| <b>PUFA 18:4 (g)</b>           | 0.01 ± 0.11     | 0.00 ± 0.00     | 0.484        | 0.00 ± 0.02     | 0.01 ± 0.03     | 0.212 |
| <b>PUFA 20:4 (g)</b>           | 0.13 ± 0.12     | 0.12 ± 0.09     | 0.565        | 0.16 ± 0.14     | 0.13 ± 0.09     | 0.331 |
| <b>PUFA 20:5 (g)</b>           | 0.01 ± 0.04     | 0.01 ± 0.03     | 0.511        | 0.01 ± 0.03     | 0.02 ± 0.04     | 0.319 |
| <b>PUFA 22:5 (g)</b>           | 0.02 ± 0.04     | 0.01 ± 0.02     | <b>0.035</b> | 0.01 ± 0.03     | 0.03 ± 0.05     | 0.230 |
| <b>PUFA 22:6 (g)</b>           | 0.06 ± 0.14     | 0.03 ± 0.07     | 0.074        | 0.05 ± 0.12     | 0.08 ± 0.17     | 0.467 |
| <b>Total n-3 (g)</b>           | 1.00 ± 1.13     | 0.98 ± 0.61     | 0.892        | 1.15 ± 0.78     | 1.11 ± 0.56     | 0.804 |
| <b>Total n-6 (g)</b>           | 9.26 ± 6.86     | 10.55 ± 7.56    | 0.171        | 11.01 ± 9.56    | 10.96 ± 7.45    | 0.980 |

|                              |                 |                 |       |                 |                 |       |
|------------------------------|-----------------|-----------------|-------|-----------------|-----------------|-------|
| <b>n-3:n-6 ratio</b>         | 10.97 ± 6.50    | 10.99 ± 5.37    | 0.983 | 11.22 ± 9.22    | 10.44 ± 5.18    | 0.686 |
| <b>Diet cholesterol (mg)</b> | 268.13 ± 187.21 | 267.98 ± 163.91 | 0.995 | 356.53 ± 272.69 | 278.13 ± 169.08 | 0.174 |
| <b>Dietary fiber (g)</b>     | 24.09 ± 12.01   | 23.66 ± 12.71   | 0.792 | 29.18 ± 15.71   | 30.07 ± 10.41   | 0.790 |
| <b>Soluble fiber (g)</b>     | 0.48 ± 0.82     | 0.41 ± 0.72     | 0.574 | 0.70 ± 1.00     | 0.62 ± 0.91     | 0.720 |
| <b>Insoluble fiber (g)</b>   | 1.06 ± 1.85     | 0.87 ± 1.63     | 0.449 | 1.61 ± 2.28     | 1.37 ± 2.01     | 0.632 |
| <b>Crude fiber (g)</b>       | 4.64 ± 14.26    | 3.56 ± 4.21     | 0.543 | 5.73 ± 15.15    | 3.59 ± 3.20     | 0.494 |
| <b>Total sugar (g)</b>       | 72.55 ± 39.52   | 77.28 ± 41.89   | 0.381 | 83.94 ± 46.74   | 85.55 ± 39.24   | 0.874 |
| <b>Added sugars (g)</b>      | 21.64 ± 21.33   | 21.83 ± 19.35   | 0.957 | 19.24 ± 15.79   | 22.11 ± 19.40   | 0.530 |
| <b>Glucose (g)</b>           | 8.12 ± 7.05     | 7.73 ± 7.29     | 0.689 | 8.15 ± 7.39     | 9.12 ± 9.48     | 0.569 |
| <b>Galactose (g)</b>         | 0.51 ± 4.11     | 0.05 ± 0.15     | 0.360 | 0.50 ± 3.59     | 0.01 ± 0.03     | 0.504 |
| <b>Fructose (g)</b>          | 10.85 ± 9.81    | 9.74 ± 9.91     | 0.403 | 11.46 ± 11.33   | 12.03 ± 13.76   | 0.826 |
| <b>Sucrose (g)</b>           | 19.33 ± 21.39   | 21.13 ± 20.01   | 0.529 | 18.40 ± 16.17   | 20.78 ± 19.58   | 0.519 |
| <b>Lactose (g)</b>           | 9.18 ± 10.24    | 9.43 ± 11.09    | 0.861 | 14.79 ± 15.85   | 9.51 ± 9.69     | 0.116 |

---

**Table S4:** Anthropometric, biochemical, and nutritional variables according to the rs3812316 SNV's of *MLXIPL* gene

| Variable                 | Women            |                  |                 | Men               |                  |                 |
|--------------------------|------------------|------------------|-----------------|-------------------|------------------|-----------------|
|                          | CC<br>N = 357    | CG+GG<br>N = 58  | <i>p</i> -value | CC<br>N = 151     | CG+GG<br>N = 21  | <i>p</i> -value |
| Age (y)                  | 41.94 ± 11.99    | 40.44 ± 9.84     | 0.367           | 39.00 ± 11.97     | 40.19 ± 12.78    | 0.674           |
| BMI (kg/m <sup>2</sup> ) | 31.27 ± 6.92     | 31.95 ± 6.74     | 0.495           | 29.26 ± 6.21      | 31.11 ± 6.93     | 0.207           |
| Waist circumference (cm) | 94.92 ± 16.17    | 96.78 ± 15.76    | 0.418           | 97.88 ± 16.60     | 103.44 ± 18.97   | 0.160           |
| Hip circumference (cm)   | 111.06 ± 14.32   | 112.11 ± 13.49   | 0.606           | 105.02 ± 11.14    | 107.90 ± 11.93   | 0.273           |
| WHR                      | 0.84 ± 0.07      | 0.86 ± 0.08      | 0.292           | 0.91 ± 0.08       | 0.94 ± 0.08      | 0.184           |
| Fat mass (g)             | 33.28 ± 13.88    | 34.61 ± 14.52    | 0.513           | 25.38 ± 14.33     | 29.62 ± 16.41    | 0.214           |
| Body fat percentage (%)  | 40.17 ± 8.89     | 40.85 ± 7.71     | 0.590           | 27.82 ± 9.66      | 28.91 ± 9.91     | 0.630           |
| Glucose (mg/dl)          | 93.52 ± 17.4     | 91.98 ± 12.79    | 0.521           | 95.57 ± 22.48     | 95.04 ± 11.85    | 0.916           |
| Insulin                  | 13.57 ± 12.95    | 12.97 ± 11.86    | 0.746           | 10.75 ± 13.17     | 10.92 ± 6.75     | 0.957           |
| HOMA-IR                  | 3.20 ± 3.42      | 2.97 ± 2.79      | 0.640           | 2.50 ± 3.08       | 2.65 ± 1.87      | 0.845           |
| Triglycerides (mg/dl)    | 142.27 ± 75.38   | 114.54 ± 52.70   | <b>0.007</b>    | 147.68 ± 69.24    | 163.44 ± 78.84   | 0.398           |
| CT (mg/dl)               | 189.04 ± 41.96   | 178.03 ± 42.75   | 0.065           | 188.00 ± 40.14    | 189.92 ± 31.19   | 0.833           |
| VLDL-c (mg/dl)           | 28.45 ± 15.07    | 22.90 ± 10.53    | <b>0.001</b>    | 29.53 ± 13.84     | 32.69 ± 15.76    | 0.338           |
| LDL-c (mg/dl)            | 115.95 ± 39.17   | 112.29 ± 35.13   | 0.504           | 117.51 ± 36.10    | 114.32 ± 24.85   | 0.696           |
| HDL-c (mg/dl)            | 44.64 ± 14.29    | 42.83 ± 12.31    | 0.363           | 40.95 ± 12.4      | 42.91 ± 13.14    | 0.501           |
| Non-HDL-c (mg/dl)        | 144.40 ± 42.70   | 135.20 ± 38.53   | 0.124           | 147.04 ± 41.62    | 147.01 ± 31.15   | 0.997           |
| Energy (kcal)            | 1865.10 ± 723.26 | 1886.00 ± 680.96 | 0.840           | 2444.41 ± 1009.83 | 2167.18 ± 726.92 | 0.227           |
| Carbohydrates (kcal)     | 916.63 ± 379.37  | 967.10 ± 376.12  | 0.356           | 1197.39 ± 519.00  | 1098.23 ± 386.77 | 0.401           |
| Proteins (kcal)          | 326.29 ± 127.40  | 298.27 ± 103.84  | 0.119           | 426.02 ± 175.12   | 380.47 ± 144.21  | 0.257           |
| Fat (kcal)               | 620.91 ± 324.22  | 620.61 ± 278.66  | 0.995           | 820.98 ± 429.34   | 688.48 ± 339.30  | 0.178           |
| Carbohydrates (%)        | 49.45 ± 9.54     | 51.44 ± 7.65     | 0.139           | 49.00 ± 9.23      | 51.24 ± 9.92     | 0.305           |
| Proteins (%)             | 17.97 ± 4.80     | 16.25 ± 4.10     | <b>0.011</b>    | 18.02 ± 4.14      | 17.65 ± 4.39     | 0.707           |

|                         |                 |                 |                   |                 |                 |              |
|-------------------------|-----------------|-----------------|-------------------|-----------------|-----------------|--------------|
| Fat (%)                 | 32.46 ± 8.93    | 32.30 ± 7.61    | 0.894             | 32.97 ± 8.46    | 31.10 ± 8.41    | 0.345        |
| Saturated fat (g)       | 23.21 ± 13.29   | 21.89 ± 10.95   | 0.483             | 30.85 ± 17.73   | 25.33 ± 13.96   | 0.173        |
| Monounsaturated fat (g) | 20.93 ± 11.64   | 21.82 ± 10.05   | 0.589             | 27.79 ± 16.34   | 24.84 ± 12.24   | 0.427        |
| Polyunsaturated fat (g) | 11.13 ± 7.94    | 13.16 ± 7.93    | 0.076             | 13.28 ± 10.27   | 12.05 ± 7.45    | 0.597        |
| SFA 4:0 (g)             | 0.34 ± 0.36     | 0.30 ± 0.28     | 0.451             | 0.42 ± 0.46     | 0.30 ± 0.26     | 0.096        |
| SFA 6:0 (g)             | 0.24 ± 0.260    | 0.24 ± 0.22     | 0.815             | 0.32 ± 0.35     | 0.24 ± 0.17     | 0.106        |
| SFA 8:0 (g)             | 0.20 ± 0.20     | 0.22 ± 0.28     | 0.385             | 0.27 ± 0.28     | 0.21 ± 0.14     | 0.123        |
| SFA 10:0 (g)            | 0.36 ± 0.34     | 0.35 ± 0.31     | 0.934             | 0.46 ± 0.42     | 0.37 ± 0.27     | 0.243        |
| SFA 12:0 (g)            | 0.41 ± 0.48     | 0.55 ± 1.44     | 0.460             | 0.49 ± 0.47     | 0.42 ± 0.29     | 0.483        |
| SFA 14:0 (g)            | 1.75 ± 1.41     | 1.62 ± 1.16     | 0.522             | 2.26 ± 1.78     | 1.96 ± 1.27     | 0.346        |
| SFA 16:0 (g)            | 10.92 ± 6.34    | 10.96 ± 5.28    | 0.957             | 14.54 ± 8.92    | 13.07 ± 6.70    | 0.469        |
| SFA 17:0 (g)            | 0.07 ± 0.59     | 0.03 ± 0.04     | 0.676             | 0.04 ± 0.06     | 0.03 ± 0.04     | 0.380        |
| SFA 18:0 (g)            | 4.75 ± 3.05     | 4.79 ± 2.46     | 0.940             | 6.36 ± 4.20     | 5.67 ± 2.74     | 0.470        |
| SFA 20:0 (g)            | 0.05 ± 0.24     | 0.05 ± 0.05     | 0.863             | 0.05 ± 0.10     | 0.03 ± 0.05     | 0.402        |
| SFA 22:0 (g)            | 0.03 ± 0.07     | 0.02 ± 0.04     | 0.832             | 0.02 ± 0.06     | 0.01 ± 0.01     | 0.309        |
| MUFA 14:1 (g)           | 0.06 ± 0.08     | 0.05 ± 0.05     | 0.149             | 0.08 ± 0.09     | 0.08 ± 0.08     | 0.864        |
| MUFA 16:1 (g)           | 1.06 ± 0.74     | 0.94 ± 0.56     | 0.269             | 1.41 ± 1.17     | 1.38 ± 0.83     | 0.934        |
| MUFA 18:1 (g)           | 18.26 ± 10.5    | 19.09 ± 8.75    | 0.576             | 24.39 ± 15.11   | 22.33 ± 11.2    | 0.550        |
| MUFA 20:1 (g)           | 0.18 ± 1.06     | 0.13 ± 0.08     | 0.683             | 0.17 ± 0.16     | 0.13 ± 0.07     | 0.285        |
| MUFA 22:1 (g)           | 0.01 ± 0.04     | 0.00 ± 0.00     | <b>&lt; 0.001</b> | 0.01 ± 0.04     | 0.01 ± 0.03     | 0.646        |
| PUFA 18:2 (g)           | 9.23 ± 6.97     | 11.42 ± 7.61    | <b>0.033</b>      | 11.11 ± 9.58    | 10.13 ± 7.18    | 0.652        |
| PUFA 18:3 (g)           | 0.90 ± 0.98     | 0.92 ± 0.51     | 0.929             | 1.05 ± 0.75     | 0.94 ± 0.36     | 0.250        |
| PUFA 18:4 (g)           | 0.01 ± 0.10     | 0 ± 0.01        | 0.567             | 0.00 ± 0.02     | 0.01 ± 0.02     | 0.651        |
| PUFA 20:4 (g)           | 0.13 ± 0.12     | 0.11 ± 0.08     | 0.292             | 0.17 ± 0.13     | 0.1 ± 0.07      | <b>0.003</b> |
| PUFA 20:5 (g)           | 0.01 ± 0.04     | 0.01 ± 0.03     | 0.508             | 0.01 ± 0.04     | 0.01 ± 0.02     | 0.515        |
| PUFA 22:5 (g)           | 0.02 ± 0.04     | 0.01 ± 0.01     | <b>0.002</b>      | 0.02 ± 0.04     | 0.01 ± 0.03     | 0.718        |
| PUFA 22:6 (g)           | 0.06 ± 0.13     | 0.03 ± 0.05     | <b>0.018</b>      | 0.06 ± 0.13     | 0.03 ± 0.10     | 0.355        |
| Total n-3 (g)           | 1.02 ± 1.11     | 0.98 ± 0.54     | 0.815             | 1.17 ± 0.78     | 1.02 ± 0.39     | 0.380        |
| Total n-6 (g)           | 9.37 ± 7.01     | 11.54 ± 7.64    | <b>0.035</b>      | 11.28 ± 9.60    | 10.23 ± 7.19    | 0.631        |
| n-3:n-6 ratio           | 10.84 ± 6.43    | 12.19 ± 5.95    | 0.144             | 10.93 ± 8.09    | 10.47 ± 5.46    | 0.804        |
| Diet cholesterol (mg)   | 271.44 ± 187.16 | 254.41 ± 157.89 | 0.520             | 369.06 ± 270.48 | 250.74 ± 164.74 | 0.053        |
| Dietary fiber (g)       | 24.06 ± 12.13   | 24.35 ± 12.11   | 0.869             | 29.60 ± 15.62   | 28.6 ± 9.710    | 0.776        |

|                            |               |               |       |               |               |       |
|----------------------------|---------------|---------------|-------|---------------|---------------|-------|
| <b>Soluble fiber (g)</b>   | 0.44 ± 0.79   | 0.52 ± 0.79   | 0.496 | 0.69 ± 1.03   | 0.61 ± 0.66   | 0.727 |
| <b>Insoluble fiber (g)</b> | 0.99 ± 1.78   | 1.12 ± 1.87   | 0.611 | 1.6 ± 2.33    | 1.37 ± 1.54   | 0.662 |
| <b>Crude fiber (g)</b>     | 4.68 ± 13.94  | 3.02 ± 1.71   | 0.374 | 5.63 ± 15.06  | 3.83 ± 3.21   | 0.586 |
| <b>Total sugar (g)</b>     | 72.70 ± 40.64 | 77.18 ± 37.11 | 0.440 | 84.48 ± 47.11 | 87.95 ± 35.44 | 0.747 |
| <b>Added sugars (g)</b>    | 22.30 ± 21.91 | 19.19 ± 14.74 | 0.392 | 19.39 ± 15.73 | 19.73 ± 19.13 | 0.940 |
| <b>Glucose (g)</b>         | 8.00 ± 7.03   | 8.12 ± 7.39   | 0.913 | 8.08 ± 7.66   | 8.47 ± 7.87   | 0.829 |
| <b>Galactose (g)</b>       | 0.49 ± 3.98   | 0.05 ± 0.16   | 0.421 | 0.49 ± 3.56   | 0.01 ± 0.03   | 0.540 |
| <b>Fructose (g)</b>        | 10.61 ± 9.71  | 10.20 ± 10.07 | 0.773 | 11.17 ± 11.36 | 11.7 ± 13.17  | 0.845 |
| <b>Sucrose (g)</b>         | 19.68 ± 21.84 | 19.00 ± 16.58 | 0.825 | 18.49 ± 16.37 | 22.66 ± 18.90 | 0.287 |
| <b>Lactose (g)</b>         | 9.17 ± 10.41  | 9.34 ± 10.74  | 0.916 | 14.54 ± 15.54 | 11.93 ± 13.24 | 0.465 |

---

**Table S5:** Frequencies of dyslipidemias according to the rs17145750 and rs3812316 SNV's of *MLXIPL* gene in women

|                                 | rs17145750 C>T |       |                 | rs3812316 C>G |       |                 |
|---------------------------------|----------------|-------|-----------------|---------------|-------|-----------------|
|                                 | CC             | CT+TT | <i>p</i> -value | CC            | CG+GG | <i>p</i> -value |
| <b>Hypercholesterolemia (%)</b> | 34.7           | 31.9  | 0.684           | 36.4          | 24.1  | 0.075           |
| <b>Elevated LDL-c (%)</b>       | 66.5           | 69.4  | 0.680           | 67.2          | 65.5  | 0.880           |
| <b>Low HDL-C (%)</b>            | 39.5           | 45.8  | 0.355           | 40.6          | 41.4  | 1.000           |
| <b>Hypertriglyceridemia (%)</b> | 36.5           | 30.6  | 0.347           | 38.1          | 19.0  | <b>0.005</b>    |

LDL-c: Low-density lipoprotein cholesterol, HDL-c: High-density lipoprotein cholesterol

**Table S6:** Frequencies of dyslipidemias according to the rs17145750 and rs3812316 SNV's of *MLXIPL* gene in men

|                                 | rs17145750 C>T |       |                 | rs3812316 C>G |       |                 |
|---------------------------------|----------------|-------|-----------------|---------------|-------|-----------------|
|                                 | CC             | CT+TT | <i>p</i> -value | CC            | CG+GG | <i>p</i> -value |
| <b>Hypercholesterolemia (%)</b> | 34.2           | 29.2  | 0.653           | 33.8          | 28.6  | 0.806           |
| <b>Elevated LDL-c (%)</b>       | 68.2           | 66.7  | 1.000           | 69.3          | 71.4  | 1.000           |
| <b>Low HDL-C (%)</b>            | 51.0           | 37.5  | 0.273           | 49.7          | 47.6  | 1.000           |
| <b>Hypertriglyceridemia (%)</b> | 41.6           | 45.8  | 0.824           | 40.4          | 52.4  | 0.348           |

LDL-c: Low-density lipoprotein cholesterol, HDL-c: High-density lipoprotein cholesterol



**Table S7.** Logistic regression models of hypertriglyceridemia in women

|         |                                      | <b>B</b> | <b><i>p</i>-value</b> | <b>OR</b> | <b>95% CI</b>         |                       |
|---------|--------------------------------------|----------|-----------------------|-----------|-----------------------|-----------------------|
|         |                                      |          |                       |           | <b>Inferior limit</b> | <b>Superior limit</b> |
| Model 1 | HDL-cholesterol (mg/dL)              | -0.066   | < 0.001               | 0.936     | 0.915                 | 0.958                 |
|         | Constant                             | 2.472    | < 0.001               | 11.842    |                       |                       |
| Model 2 | Total cholesterol (mg/dL)            | 0.019    | < 0.001               | 1.020     | 1.012                 | 1.027                 |
|         | HDL-cholesterol (mg/dL)              | -0.083   | < 0.001               | 0.921     | 0.898                 | 0.945                 |
|         | Constant                             | -0.581   | 0.439                 | 0.559     |                       |                       |
| Model 3 | Total cholesterol (mg/dL)            | 0.021    | < 0.001               | 1.021     | 1.013                 | 1.029                 |
|         | HDL-cholesterol (mg/dL)              | -0.072   | < 0.001               | 0.930     | 0.906                 | 0.955                 |
|         | Waist circumference (cm)             | 0.040    | < 0.001               | 1.041     | 1.022                 | 1.060                 |
|         | Constant                             | -5.204   | < 0.001               | 0.005     |                       |                       |
|         | Glucose (mg/dL)                      | 0.030    | 0.026                 | 1.030     | 1.004                 | 1.057                 |
|         | Total cholesterol (mg/dL)            | 0.021    | < 0.001               | 1.022     | 1.014                 | 1.030                 |
| Model 4 | HDL-cholesterol (mg/dL)              | -0.072   | < 0.001               | 0.931     | 0.907                 | 0.955                 |
|         | Waist circumference (cm)             | 0.037    | < 0.001               | 1.038     | 1.018                 | 1.058                 |
|         | Constant                             | -7.743   | < 0.001               | 0.000     |                       |                       |
|         | Glucose (mg/dL)                      | 0.030    | 0.029                 | 1.030     | 1.003                 | 1.058                 |
|         | Total cholesterol (mg/dL)            | 0.021    | < 0.001               | 1.021     | 1.013                 | 1.030                 |
| Model 5 | HDL-cholesterol (mg/dL)              | -0.072   | < 0.001               | 0.931     | 0.907                 | 0.955                 |
|         | Waist circumference (cm)             | 0.039    | < 0.001               | 1.039     | 1.020                 | 1.060                 |
|         | SNV's rs3812316 (CC <i>vs</i> CG+GG) | -1.042   | 0.020                 | 0.353     | 0.147                 | 0.846                 |
|         | Constant                             | -7.725   | < 0.001               | 0.000     |                       |                       |

**Table S8.** Logistic regression models of hypertriglyceridemia in men

|         |                           | <b>B</b> | <b><i>p</i>-value</b> | <b>OR</b> | <b>95% CI</b>         |                       |
|---------|---------------------------|----------|-----------------------|-----------|-----------------------|-----------------------|
|         |                           |          |                       |           | <b>Inferior limit</b> | <b>Superior limit</b> |
| Model 1 | HDL-cholesterol (mg/dL)   | -0.114   | < 0.001               | 0.892     | 0.849                 | 0.939                 |
|         | Constant                  | 4.171    | < 0.001               | 64.754    |                       |                       |
|         | Total cholesterol (mg/dL) | 0.022    | 0.001                 | 1.023     | 1.010                 | 1.036                 |
| Model 2 | HDL-cholesterol (mg/dL)   | -0.127   | < 0.001               | 0.881     | 0.833                 | 0.932                 |
|         | Constant                  | 0.363    | 0.804                 | 1.438     |                       |                       |
|         | Total cholesterol (mg/dL) | 0.024    | 0.001                 | 1.024     | 1.010                 | 1.038                 |
| Model 3 | HDL-cholesterol (mg/dL)   | -0.125   | < 0.001               | 0.883     | 0.833                 | 0.936                 |
|         | Protein intake (g)        | -0.016   | 0.010                 | 0.984     | 0.972                 | 0.996                 |
|         | Constant                  | 1.716    | 0.293                 | 5.564     |                       |                       |
|         | Total cholesterol (mg/dL) | 0.021    | 0.003                 | 1.021     | 1.007                 | 1.035                 |
| Model 4 | HDL-cholesterol (mg/dL)   | -0.107   | < 0.001               | 0.898     | 0.846                 | 0.953                 |
|         | Fat mass (kg)             | 0.061    | 0.031                 | 1.063     | 1.005                 | 1.124                 |
|         | Protein intake (g)        | -0.014   | 0.026                 | 0.986     | 0.973                 | 0.998                 |
|         | Constant                  | -0.333   | 0.862                 | 0.717     |                       |                       |

**Table S9.** Multiple lineal regression of parameters associated with triglyceride levels in women

|                                             | <b>B</b> | <b>Standard error</b> | <b>95% CI</b>   | <b><i>p</i>-value</b> |
|---------------------------------------------|----------|-----------------------|-----------------|-----------------------|
| <b><i>Model 1, R<sup>2</sup> = 18.9</i></b> |          |                       |                 |                       |
| HDL-cholesterol                             | -0.006   | 0.001                 | -0.008 – -0.005 | < 0.001               |
| <b><i>Model 2, R<sup>2</sup> = 32.2</i></b> |          |                       |                 |                       |
| HDL-cholesterol                             | -0.007   | 0.001                 | -0.008 – -0.006 | < 0.001               |
| Total cholesterol                           | 0.002    | 0.000                 | 0.001 – 0.002   | < 0.001               |
| <b><i>Model 3, R<sup>2</sup> = 63.1</i></b> |          |                       |                 |                       |
| HDL-cholesterol                             | -0.006   | 0.001                 | -0.007 – -0.004 | < 0.001               |
| Total cholesterol                           | 0.002    | 0.000                 | 0.001 – 0.002   | < 0.001               |
| Waist circumference                         | 0.004    | 0.001                 | 0.002 – 0.005   | < 0.001               |
| <b><i>Model 4, R<sup>2</sup> = 64.3</i></b> |          |                       |                 |                       |
| HDL-cholesterol                             | -0.006   | 0.001                 | -0.007 – -0.004 | < 0.001               |
| Total cholesterol                           | 0.002    | 0.000                 | 0.001 – 0.002   | < 0.001               |
| Waist circumference                         | 0.004    | 0.001                 | 0.003 – 0.005   | < 0.001               |
| SNV's rs3812316 C/G                         | -0.073   | 0.028                 | -0.127 – -0.019 | 0.008                 |

HDL-cholesterol: High-density lipoprotein cholesterol, CI: Confidence Interval.

**Table S10.** Multiple lineal regression of parameters associated with triglyceride levels in men

|                                             | <b>B</b> | <b>Standard error</b> | <b>95% IC</b>   | <b><i>p</i>-value</b> |
|---------------------------------------------|----------|-----------------------|-----------------|-----------------------|
| <b><i>Model 1, R<sup>2</sup> = 58.3</i></b> |          |                       |                 |                       |
| HDL-cholesterol                             | -0.010   | 0.002                 | -0.014 – -0.007 | < 0.001               |
| <b><i>Model 2, R<sup>2</sup> = 70.4</i></b> |          |                       |                 |                       |
| HDL-cholesterol                             | -0.008   | 0.002                 | -0.011 – -0.005 | < 0.001               |
| Body fat percentage                         | 0.008    | 0.002                 | 0.005 – 0.012   | < 0.001               |
| <b><i>Model 3, R<sup>2</sup> = 74.0</i></b> |          |                       |                 |                       |
| HDL-cholesterol                             | -0.008   | 0.002                 | -0.011 – -0.005 | < 0.001               |
| Body fat percentage                         | 0.008    | 0.002                 | 0.005 – 0.012   | < 0.001               |
| Albumin                                     | 0.092    | 0.033                 | 0.026 – 0.157   | 0.007                 |
| <b><i>Model 4, R<sup>2</sup> = 77.6</i></b> |          |                       |                 |                       |
| HDL-cholesterol                             | -0.007   | 0.001                 | -0.010 – -0.004 | < 0.001               |
| Body fat percentage                         | 0.007    | 0.002                 | 0.004 – 0.011   | < 0.001               |
| Albumin                                     | 0.118    | 0.032                 | 0.054 – 0.182   | < 0.001               |
| Total dietary fiber                         | -0.004   | 0.001                 | -0.007 – -0.001 | 0.004                 |

HDL-cholesterol: High-density lipoprotein cholesterol, CI: Confidence Interval.
